# Supplementary material for: Boronic acid based imprinted electrochemical sensor for rutin recognition and detection
Source: Royal Society of Chemistry journal article supplement (doi:10.1039/c6an01294a), 2016-01-01
Supplement: c6an01294a1.pdf [file c6an01294a1.pdf]

## Supporting Information

### Boronic acid based imprinted electrochemical sensor for rutin recognition and detection

Chunlei Wang, Qi Wang, Min Zhong, Xianwen Kan\*

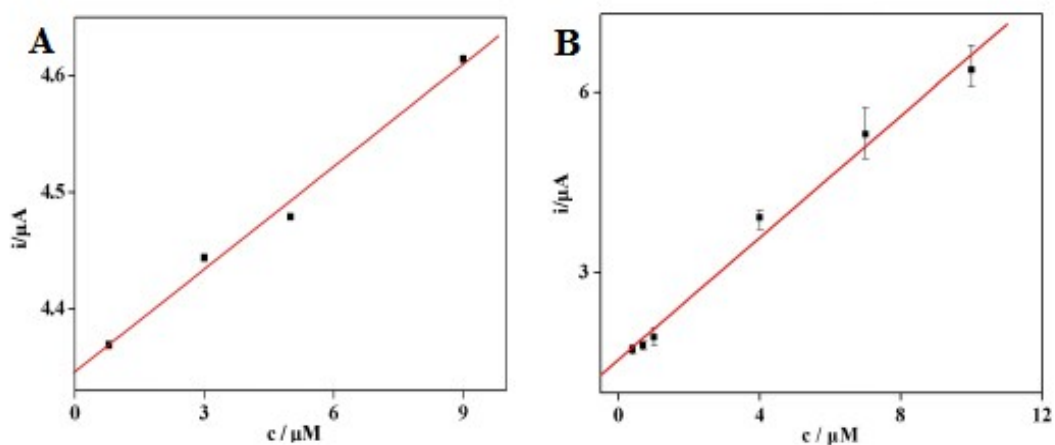

Fig. S1 The calibration plot of the concentration of rutin vs. peak current recorded on MIP/GCE (A) and MIP/MWNTs/GCE (B).
